# Supplementary material for: The pyroptosis-related gene signature predicts prognosis and indicates immune activity in hepatocellular carcinoma
Source: PubMed Central journal article supplement (PMC8818170; doi:10.1186/s10020-022-00445-0), 2022-02-05
Supplement: 10020_2022_445_MOESM1_ESM.pdf [file 10020_2022_445_MOESM1_ESM.pdf]

**Table S1 The expression levels of pyroptosis-related genes**

| gene   | conMean  | treatMean | logFC    | pValue   |
|--------|----------|-----------|----------|----------|
| BAK1   | 2.432961 | 7.457171  | 1.615915 | 1.55E-17 |
| BAX    | 7.321618 | 21.10099  | 1.527077 | 7.52E-23 |
| CASP1  | 2.356665 | 2.667478  | 0.17873  | 0.697343 |
| CASP3  | 4.186012 | 8.440812  | 1.011805 | 1.98E-17 |
| CASP4  | 4.200851 | 5.106819  | 0.281743 | 0.032861 |
| CASP5  | 0.044708 | 0.087947  | 0.976092 | 0.161364 |
| CHMP2A | 33.2192  | 65.21389  | 0.973162 | 9.02E-22 |
| CHMP2B | 7.371213 | 9.876101  | 0.42204  | 1.91E-05 |
| CHMP3  | 2.053975 | 4.198039  | 1.031297 | 4.04E-17 |
| CHMP4A | 0.443958 | 0.76115   | 0.777757 | 4.87E-06 |
| CHMP4B | 32.05286 | 59.56277  | 0.893958 | 6.59E-18 |
| CHMP4C | 2.545459 | 6.03191   | 1.244689 | 2.37E-14 |
| CHMP6  | 7.3808   | 13.82232  | 0.905151 | 7.64E-20 |
| CHMP7  | 4.307537 | 5.458556  | 0.341656 | 0.006106 |
| GSDMD  | 12.95306 | 31.07515  | 1.262469 | 2.96E-22 |
| GSDME  | 0.421524 | 1.127308  | 1.419194 | 0.000548 |
| HMGB1  | 11.3255  | 15.98758  | 0.497377 | 2.20E-09 |
| IL18   | 1.569285 | 2.267976  | 0.531298 | 0.525646 |
| IL1A   | 0.010728 | 0.024858  | 1.212383 | 0.007353 |
| IL1B   | 0.87439  | 0.418351  | -1.06356 | 2.07E-10 |
| TP53   | 4.954549 | 8.223167  | 0.73094  | 5.80E-06 |
| CASP6  | 5.030208 | 6.864277  | 0.44849  | 3.49E-05 |
| CASP8  | 1.376885 | 2.831424  | 1.040119 | 1.52E-15 |
| CASP9  | 1.788567 | 2.520602  | 0.494964 | 3.54E-05 |
| GPX4   | 118.5358 | 188.6939  | 0.670725 | 1.28E-10 |
| GSDMB  | 1.344026 | 3.636747  | 1.436088 | 1.66E-13 |
| GSDMC  | 0.008303 | 0.234081  | 4.817161 | 8.32E-19 |
| IL6    | 0.867032 | 0.320722  | -1.43476 | 3.10E-05 |
| NLRP1  | 0.40596  | 1.071783  | 1.400604 | 1.31E-09 |
| NLRP3  | 0.351909 | 0.279273  | -0.33353 | 0.002313 |
| NLRP6  | 1.072124 | 1.192416  | 0.153417 | 0.001136 |
| NLRP7  | 0.013511 | 0.020493  | 0.60107  | 0.002028 |
| NOD1   | 0.325471 | 0.663693  | 1.027988 | 4.82E-14 |
| NOD2   | 0.19404  | 0.340295  | 0.810434 | 0.007793 |
| TNF    | 0.249332 | 0.245633  | -0.02157 | 0.052419 |
