# Supplementary material for: The pyroptosis-related gene signature predicts prognosis and indicates immune activity in hepatocellular carcinoma
Source: PubMed Central journal article supplement (PMC8818170; doi:10.1186/s10020-022-00445-0), 2022-02-05
Supplement: 10020_2022_445_MOESM2_ESM.pdf [file 10020_2022_445_MOESM2_ESM.pdf]

**Table S2 Differentially expressed genes**

| gene    | lowMean  | highMean | logFC    | pValue   | fdr      |
|---------|----------|----------|----------|----------|----------|
| CYP3A4  | 7.898101 | 6.479047 | -1.41905 | 3.27E-05 | 0.000116 |
| MCM3    | 5.254856 | 5.895022 | 0.640165 | 3.41E-11 | 9.01E-10 |
| F12     | 9.02026  | 8.126904 | -0.89336 | 2.26E-08 | 2.29E-07 |
| ANXA5   | 7.070832 | 7.700991 | 0.630158 | 9.40E-09 | 1.09E-07 |
| SLC6A12 | 5.298526 | 4.346406 | -0.95212 | 1.72E-11 | 5.31E-10 |
| IGSF3   | 3.526241 | 4.417293 | 0.891051 | 1.03E-16 | 5.98E-14 |
| ASGR1   | 8.790918 | 8.054241 | -0.73668 | 2.47E-14 | 2.93E-12 |
| DTYMK   | 5.230751 | 5.843743 | 0.612992 | 1.55E-13 | 1.20E-11 |
| LMNB1   | 4.729678 | 5.413635 | 0.683957 | 1.89E-10 | 3.78E-09 |
| TFF2    | 2.729505 | 3.326458 | 0.596954 | 1.23E-06 | 6.89E-06 |
| LMNB2   | 4.716422 | 5.340658 | 0.624237 | 2.74E-12 | 1.21E-10 |
| SPP1    | 6.264279 | 8.071997 | 1.807717 | 9.46E-09 | 1.09E-07 |
| MCM6    | 4.928342 | 5.569755 | 0.641414 | 2.09E-11 | 6.18E-10 |
| MMD     | 4.171513 | 4.828597 | 0.657085 | 2.23E-11 | 6.45E-10 |
| APOA4   | 4.435754 | 5.11289  | 0.677136 | 0.031594 | 0.04906  |
| CDO1    | 8.243294 | 7.059843 | -1.18345 | 3.55E-14 | 4.00E-12 |
| AHSG    | 10.93955 | 10.13331 | -0.80624 | 0.000408 | 0.00107  |
| MCM4    | 4.897091 | 5.568394 | 0.671303 | 1.10E-11 | 3.68E-10 |
| STK39   | 3.882167 | 4.49486  | 0.612693 | 6.29E-08 | 5.33E-07 |
| HSD11B1 | 7.976531 | 7.220306 | -0.75622 | 0.006061 | 0.01147  |
| SCGN    | 4.310471 | 5.021217 | 0.710746 | 5.33E-05 | 0.000177 |
| PFKFB3  | 4.678195 | 5.275785 | 0.59759  | 0.00013  | 0.000393 |
| DCXR    | 9.482119 | 8.643617 | -0.8385  | 4.95E-08 | 4.36E-07 |
| HGFAC   | 5.870147 | 4.475569 | -1.39458 | 9.23E-09 | 1.07E-07 |
| ENO1    | 8.978525 | 9.656539 | 0.678013 | 9.94E-15 | 1.31E-12 |
| CTH     | 6.589081 | 5.784623 | -0.80446 | 2.34E-06 | 1.18E-05 |
| GYS2    | 5.725454 | 4.85299  | -0.87246 | 4.84E-07 | 3.07E-06 |
| ECT2    | 3.39184  | 4.152289 | 0.760448 | 2.73E-15 | 6.28E-13 |
| BAK1    | 4.442403 | 5.247505 | 0.805102 | 3.70E-20 | 1.71E-16 |
| CXCL1   | 3.681217 | 4.558975 | 0.877758 | 2.43E-06 | 1.22E-05 |
| TK1     | 5.633809 | 6.370776 | 0.736966 | 7.14E-10 | 1.24E-08 |
| ALDH2   | 7.90239  | 7.28598  | -0.61641 | 4.84E-11 | 1.17E-09 |
| SULT1C2 | 3.68969  | 4.547545 | 0.857855 | 1.31E-11 | 4.26E-10 |
| CCL20   | 5.082086 | 5.886347 | 0.80426  | 8.17E-05 | 0.000259 |
| MMP7    | 3.918272 | 4.617131 | 0.69886  | 1.48E-05 | 5.87E-05 |
| TACC3   | 3.931608 | 4.633592 | 0.701984 | 3.16E-13 | 2.32E-11 |
| SULT2A1 | 9.172646 | 8.462712 | -0.70993 | 0.001294 | 0.002933 |
| ITGA3   | 3.402424 | 4.000474 | 0.59805  | 0.001838 | 0.003991 |
| AGXT    | 9.511097 | 8.696304 | -0.81479 | 4.28E-06 | 2.01E-05 |
| CAV2    | 5.011808 | 5.640408 | 0.6286   | 2.49E-08 | 2.48E-07 |
| RGN     | 7.491299 | 6.706324 | -0.78497 | 4.62E-11 | 1.13E-09 |
| C4BPA   | 9.690734 | 8.612333 | -1.0784  | 2.05E-11 | 6.09E-10 |
| VNN1    | 6.159216 | 6.962243 | 0.803027 | 8.63E-05 | 0.000271 |
| ASRGL1  | 3.005094 | 3.610393 | 0.605298 | 1.89E-11 | 5.71E-10 |
| SPAG5   | 4.695742 | 5.321309 | 0.625567 | 4.05E-11 | 1.02E-09 |
| FMO3    | 8.34301  | 7.477153 | -0.86586 | 7.51E-08 | 6.19E-07 |
| PFN2    | 3.662308 | 4.428873 | 0.766566 | 3.13E-08 | 2.95E-07 |
| RFC4    | 4.25769  | 4.861091 | 0.603401 | 3.64E-12 | 1.53E-10 |
| ANXA13  | 4.001024 | 4.625285 | 0.624261 | 3.72E-05 | 0.00013  |
| TRIP13  | 3.136033 | 3.848588 | 0.712555 | 4.67E-17 | 3.09E-14 |
| BIRC5   | 4.434837 | 5.434961 | 1.000124 | 5.42E-15 | 1.05E-12 |
| TAT     | 8.118161 | 6.969022 | -1.14914 | 1.50E-05 | 5.94E-05 |
| UCHL1   | 2.895269 | 3.499432 | 0.604163 | 0.000144 | 0.000429 |
| RAMP3   | 5.336945 | 4.605007 | -0.73194 | 9.77E-11 | 2.11E-09 |
| ITGB4   | 3.510126 | 4.152741 | 0.642615 | 1.26E-06 | 6.98E-06 |

|         |          |          |          |          |          |
|---------|----------|----------|----------|----------|----------|
| PSPH    | 4.996092 | 5.688212 | 0.69212  | 8.70E-13 | 4.85E-11 |
| HPD     | 9.560179 | 8.091026 | -1.46915 | 5.21E-08 | 4.57E-07 |
| CYP4A11 | 7.255642 | 6.423642 | -0.832   | 1.06E-06 | 6.03E-06 |
| SPARCL1 | 6.632629 | 5.853102 | -0.77953 | 2.03E-07 | 1.43E-06 |
| UBE2S   | 3.944669 | 4.635261 | 0.690593 | 4.74E-14 | 4.99E-12 |
| KIF2C   | 3.473943 | 4.331325 | 0.857382 | 4.70E-16 | 1.39E-13 |
| ENAH    | 4.722589 | 5.445111 | 0.722523 | 4.82E-16 | 1.39E-13 |
| G6PD    | 4.583884 | 5.639289 | 1.055405 | 2.85E-15 | 6.28E-13 |
| CCNB2   | 3.595091 | 4.344521 | 0.74943  | 2.03E-12 | 9.48E-11 |
| CYP2A6  | 7.422023 | 6.687228 | -0.73479 | 0.022563 | 0.036252 |
| CDC20   | 4.380094 | 5.477988 | 1.097894 | 6.75E-15 | 1.15E-12 |
| MAT1A   | 9.35846  | 8.647914 | -0.71055 | 8.59E-09 | 1.00E-07 |
| MCM7    | 6.187237 | 6.774533 | 0.587296 | 7.36E-12 | 2.79E-10 |
| DAB2    | 4.579421 | 5.196902 | 0.617481 | 4.46E-08 | 3.99E-07 |
| HPX     | 10.50133 | 9.686139 | -0.81519 | 3.89E-07 | 2.54E-06 |
| DDR1    | 3.981023 | 4.757963 | 0.77694  | 4.02E-08 | 3.63E-07 |
| CXCL5   | 2.708286 | 3.347299 | 0.639013 | 5.68E-07 | 3.51E-06 |
| STX3    | 4.28685  | 4.921501 | 0.634651 | 4.93E-14 | 5.07E-12 |
| CTHRC1  | 3.73822  | 4.341985 | 0.603765 | 0.000259 | 0.000715 |
| SNX7    | 4.565593 | 5.301087 | 0.735494 | 7.80E-15 | 1.17E-12 |
| GNPDA1  | 4.707114 | 5.305765 | 0.598651 | 3.12E-15 | 6.56E-13 |
| FGA     | 12.0841  | 11.44863 | -0.63546 | 4.67E-06 | 2.16E-05 |
| GAL3ST1 | 3.704832 | 4.567013 | 0.86218  | 3.19E-06 | 1.56E-05 |
| TUSC3   | 3.744963 | 4.343703 | 0.59874  | 5.15E-05 | 0.000172 |
| SPP2    | 7.223815 | 6.284262 | -0.93955 | 1.30E-05 | 5.26E-05 |
| ZWINT   | 4.451136 | 5.286065 | 0.834929 | 1.25E-13 | 1.02E-11 |
| SLC16A3 | 3.359807 | 4.09976  | 0.739953 | 3.28E-09 | 4.48E-08 |
| PDK4    | 6.444105 | 5.777766 | -0.66634 | 1.17E-05 | 4.82E-05 |
| CES2    | 7.46722  | 6.829752 | -0.63747 | 3.99E-05 | 0.000138 |
| CDC6    | 3.468464 | 4.271055 | 0.802591 | 3.19E-16 | 1.39E-13 |
| ALDOA   | 6.849151 | 7.653742 | 0.804592 | 2.20E-12 | 1.00E-10 |
| CD24    | 5.461171 | 6.951523 | 1.490352 | 8.08E-12 | 2.97E-10 |
| LAPTM4B | 5.959517 | 6.929506 | 0.969989 | 3.53E-13 | 2.56E-11 |
| HP      | 11.06564 | 10.10617 | -0.95946 | 1.02E-06 | 5.84E-06 |
| MPZL1   | 5.070513 | 5.689433 | 0.618919 | 9.79E-12 | 3.41E-10 |
| CYP2C9  | 7.639093 | 6.508837 | -1.13026 | 1.06E-09 | 1.71E-08 |
| AR      | 5.592091 | 4.976173 | -0.61592 | 2.32E-07 | 1.63E-06 |
| FGFR2   | 4.375662 | 5.004014 | 0.628352 | 0.000226 | 0.000635 |
| UBE2C   | 4.890763 | 5.92169  | 1.030926 | 1.89E-12 | 9.01E-11 |
| CYP1A1  | 4.989932 | 3.897776 | -1.09216 | 1.84E-05 | 7.10E-05 |
| TPX2    | 4.841065 | 5.689849 | 0.848784 | 8.71E-14 | 8.22E-12 |
| CD14    | 8.996597 | 8.323717 | -0.67288 | 7.17E-08 | 5.96E-07 |
| CPB2    | 9.607876 | 8.909594 | -0.69828 | 1.15E-08 | 1.28E-07 |
| PFKFB1  | 5.143093 | 4.510501 | -0.63259 | 3.24E-05 | 0.000115 |
| ITPR3   | 2.749459 | 3.352097 | 0.602638 | 3.38E-06 | 1.64E-05 |
| SFN     | 4.507511 | 5.75267  | 1.245159 | 6.65E-10 | 1.16E-08 |
| CBX1    | 4.827893 | 5.434018 | 0.606125 | 8.31E-14 | 8.01E-12 |
| FEN1    | 4.780034 | 5.406358 | 0.626325 | 1.06E-12 | 5.79E-11 |
| ATP1B3  | 4.963415 | 5.697423 | 0.734008 | 2.46E-11 | 6.94E-10 |
| CDKN3   | 4.443211 | 5.171183 | 0.727972 | 1.26E-09 | 1.95E-08 |
| CCNB1   | 4.468916 | 5.416171 | 0.947256 | 3.55E-15 | 7.15E-13 |
| ANXA2   | 6.284549 | 6.892156 | 0.607607 | 2.01E-08 | 2.08E-07 |
| CDC25B  | 4.8361   | 5.484379 | 0.648279 | 4.78E-11 | 1.16E-09 |
| KDEL3   | 5.032171 | 5.686836 | 0.654665 | 2.54E-07 | 1.75E-06 |
| MT1A    | 6.227559 | 5.495258 | -0.7323  | 0.00014  | 0.000418 |
| BUB1B   | 3.405361 | 4.086948 | 0.681587 | 1.46E-14 | 1.83E-12 |
| DUSP9   | 4.077361 | 4.710696 | 0.633335 | 0.001326 | 0.002996 |
| SPINK1  | 6.723951 | 7.561385 | 0.837434 | 0.016406 | 0.027536 |

|          |          |          |          |          |          |
|----------|----------|----------|----------|----------|----------|
| PON3     | 7.099786 | 6.463186 | -0.6366  | 7.56E-09 | 9.04E-08 |
| PYGB     | 5.40719  | 6.044371 | 0.63718  | 4.71E-13 | 2.99E-11 |
| NUSAP1   | 4.935891 | 5.680905 | 0.745014 | 9.12E-12 | 3.25E-10 |
| C7       | 5.65151  | 4.820255 | -0.83126 | 0.000124 | 0.000377 |
| NDRG1    | 6.039881 | 6.769635 | 0.729754 | 6.11E-09 | 7.48E-08 |
| CFHR4    | 5.674184 | 4.496646 | -1.17754 | 4.59E-12 | 1.86E-10 |
| TSPAN13  | 5.266025 | 5.854075 | 0.58805  | 0.000198 | 0.000567 |
| MYBL2    | 4.020524 | 5.347165 | 1.326641 | 6.43E-18 | 9.92E-15 |
| GSDME    | 3.161541 | 3.833841 | 0.6723   | 4.70E-18 | 9.92E-15 |
| GLS      | 4.603038 | 5.202601 | 0.599563 | 2.06E-10 | 4.08E-09 |
| C4BPB    | 8.275137 | 7.602226 | -0.67291 | 2.45E-08 | 2.45E-07 |
| GMNN     | 5.763621 | 6.361547 | 0.597925 | 3.22E-09 | 4.42E-08 |
| STMN1    | 5.027294 | 5.768931 | 0.741637 | 3.38E-11 | 9.00E-10 |
| CCL21    | 5.741392 | 5.08786  | -0.65353 | 0.005838 | 0.011094 |
| CYP2B6   | 6.267821 | 5.64961  | -0.61821 | 0.000847 | 0.002026 |
| PAFAH1B3 | 4.934941 | 5.830991 | 0.896049 | 1.17E-13 | 1.02E-11 |
| F9       | 7.438108 | 6.684527 | -0.75358 | 0.000566 | 0.001421 |
| CENPF    | 3.446956 | 4.097488 | 0.650532 | 1.10E-11 | 3.68E-10 |
| SLC2A2   | 7.386903 | 6.650042 | -0.73686 | 4.40E-07 | 2.83E-06 |
| AOX1     | 8.400158 | 7.299841 | -1.10032 | 8.13E-09 | 9.60E-08 |
| HRG      | 9.482599 | 8.842989 | -0.63961 | 0.003603 | 0.007243 |
| CAPG     | 5.319884 | 6.088571 | 0.768687 | 1.95E-08 | 2.02E-07 |
| BHMT     | 7.388463 | 6.771195 | -0.61727 | 0.007634 | 0.01405  |
| CLSTN1   | 5.173701 | 5.773857 | 0.600156 | 2.64E-08 | 2.60E-07 |
| PLK1     | 3.487929 | 4.248079 | 0.76015  | 7.39E-16 | 1.90E-13 |
| SLC13A3  | 4.622106 | 3.844328 | -0.77778 | 0.000315 | 0.000851 |
| DPYS     | 7.786216 | 7.180342 | -0.60587 | 0.002385 | 0.005015 |
| ITGA5    | 5.654437 | 6.254503 | 0.600067 | 3.48E-11 | 9.15E-10 |
| CDK4     | 5.302999 | 5.954203 | 0.651204 | 1.72E-11 | 5.31E-10 |
| MT1X     | 7.472694 | 6.683977 | -0.78872 | 0.000558 | 0.001401 |
| SERPINF2 | 9.970557 | 9.201232 | -0.76932 | 3.67E-09 | 4.89E-08 |
| ANG      | 9.583809 | 8.800132 | -0.78368 | 1.50E-08 | 1.60E-07 |
| PI3      | 3.092219 | 3.713734 | 0.621515 | 5.33E-06 | 2.43E-05 |
| PTTG1    | 5.053325 | 5.905619 | 0.852294 | 3.27E-11 | 8.85E-10 |
| S100P    | 4.402581 | 5.236342 | 0.833761 | 0.003341 | 0.006772 |
| GINS1    | 3.517712 | 4.274154 | 0.756442 | 2.81E-17 | 2.45E-14 |
| HLF      | 5.471317 | 4.868623 | -0.60269 | 1.58E-05 | 6.20E-05 |
| NCAPH    | 3.446529 | 4.275926 | 0.829397 | 4.78E-16 | 1.39E-13 |
| HMGA1    | 6.604243 | 7.418596 | 0.814353 | 6.12E-13 | 3.73E-11 |
| EHHADH   | 7.449395 | 6.857477 | -0.59192 | 1.64E-05 | 6.43E-05 |
| DSG2     | 4.203828 | 5.290764 | 1.086936 | 3.18E-17 | 2.45E-14 |
| FABP4    | 4.763634 | 4.030658 | -0.73298 | 1.38E-07 | 1.03E-06 |
| CKAP4    | 6.573889 | 7.210607 | 0.636718 | 1.59E-11 | 5.09E-10 |
| ADH1B    | 9.178583 | 7.622207 | -1.55638 | 7.16E-13 | 4.20E-11 |
| KNG1     | 10.36019 | 9.72718  | -0.63301 | 0.000111 | 0.000341 |
| GPT      | 6.68714  | 6.040624 | -0.64652 | 5.41E-06 | 2.46E-05 |
| TUBG1    | 5.996407 | 6.593634 | 0.597227 | 7.20E-15 | 1.15E-12 |
| HSD17B6  | 8.613323 | 7.898219 | -0.7151  | 1.59E-05 | 6.25E-05 |
| NEK2     | 4.076236 | 4.790773 | 0.714536 | 7.41E-12 | 2.79E-10 |
| GTSE1    | 3.258536 | 3.850231 | 0.591695 | 2.89E-14 | 3.34E-12 |
| SLPI     | 7.624706 | 8.381991 | 0.757285 | 0.002534 | 0.005272 |
| RENBP    | 4.58426  | 5.20227  | 0.61801  | 3.15E-05 | 0.000113 |
| SLC6A8   | 3.729231 | 4.439077 | 0.709846 | 4.91E-05 | 0.000165 |
| CYP2E1   | 8.662829 | 6.86001  | -1.80282 | 3.38E-09 | 4.61E-08 |
| SLC10A1  | 6.946893 | 5.81641  | -1.13048 | 3.94E-06 | 1.86E-05 |
| E2F1     | 4.395363 | 5.26526  | 0.869898 | 5.98E-12 | 2.32E-10 |
| CCNE1    | 3.258488 | 3.846631 | 0.588144 | 4.96E-12 | 1.99E-10 |
| SMOX     | 4.057154 | 4.665245 | 0.608091 | 4.00E-08 | 3.62E-07 |

|          |          |          |          |          |          |
|----------|----------|----------|----------|----------|----------|
| SOX4     | 4.142818 | 5.061892 | 0.919074 | 5.67E-11 | 1.32E-09 |
| FOXM1    | 3.712329 | 4.537431 | 0.825102 | 5.35E-13 | 3.30E-11 |
| NDC80    | 3.51316  | 4.113718 | 0.600558 | 4.36E-12 | 1.79E-10 |
| TYMS     | 5.061131 | 5.740306 | 0.679176 | 1.15E-09 | 1.85E-08 |
| KCNJ8    | 6.037733 | 5.329756 | -0.70798 | 8.43E-09 | 9.91E-08 |
| SRC      | 4.088385 | 4.675121 | 0.586737 | 2.04E-08 | 2.11E-07 |
| NR1I3    | 6.307699 | 5.583269 | -0.72443 | 1.25E-05 | 5.07E-05 |
| IMPDH1   | 3.723031 | 4.323309 | 0.600278 | 1.38E-07 | 1.03E-06 |
| HOMER3   | 4.373171 | 4.978539 | 0.605368 | 1.57E-07 | 1.16E-06 |
| CYP1A2   | 4.9654   | 3.899686 | -1.06571 | 0.000156 | 0.000459 |
| CD5L     | 4.312734 | 3.489475 | -0.82326 | 2.56E-09 | 3.66E-08 |
| AQP9     | 8.531752 | 7.0717   | -1.46005 | 5.40E-11 | 1.28E-09 |
| MKI67    | 3.268921 | 3.935269 | 0.666348 | 1.69E-11 | 5.31E-10 |
| LCAT     | 6.012126 | 5.290978 | -0.72115 | 2.45E-08 | 2.45E-07 |
| GPC3     | 7.794902 | 8.529491 | 0.734589 | 0.005449 | 0.010406 |
| PLG      | 9.175379 | 8.303222 | -0.87216 | 2.10E-07 | 1.48E-06 |
| KPNA2    | 5.643015 | 6.450251 | 0.807236 | 4.47E-16 | 1.39E-13 |
| APOM     | 8.702621 | 8.080337 | -0.62228 | 9.39E-05 | 0.000293 |
| TMSB10   | 10.11199 | 10.77658 | 0.664586 | 4.63E-06 | 2.14E-05 |
| CYP27A1  | 9.3028   | 8.530647 | -0.77215 | 2.23E-11 | 6.45E-10 |
| CLDN4    | 3.527986 | 4.503669 | 0.975683 | 6.02E-07 | 3.70E-06 |
| KRT19    | 3.330862 | 3.979436 | 0.648573 | 0.008764 | 0.015915 |
| PRG4     | 5.877511 | 6.526551 | 0.64904  | 0.000584 | 0.001459 |
| IGF2     | 6.891293 | 6.222643 | -0.66865 | 0.019926 | 0.032673 |
| MT2A     | 9.401612 | 8.687717 | -0.7139  | 0.000873 | 0.00208  |
| ECM2     | 5.329197 | 4.744144 | -0.58505 | 9.23E-09 | 1.07E-07 |
| ALDOB    | 11.05539 | 10.41598 | -0.6394  | 0.006194 | 0.011694 |
| ADH1A    | 8.722421 | 7.798044 | -0.92438 | 5.68E-08 | 4.88E-07 |
| AZGP1    | 9.607453 | 8.87484  | -0.73261 | 2.87E-06 | 1.41E-05 |
| EZH2     | 3.694363 | 4.359732 | 0.665369 | 7.08E-15 | 1.15E-12 |
| SLC22A1  | 7.029178 | 6.111476 | -0.9177  | 0.000456 | 0.001179 |
| S100A9   | 5.193497 | 5.848266 | 0.654769 | 0.001857 | 0.004029 |
| BDH1     | 6.622462 | 6.00012  | -0.62234 | 8.08E-08 | 6.57E-07 |
| NKG7     | 5.292607 | 4.660338 | -0.63227 | 5.54E-09 | 6.88E-08 |
| TRIB3    | 5.454035 | 6.127396 | 0.673361 | 1.85E-10 | 3.72E-09 |
| ALDH1L1  | 7.040199 | 6.354721 | -0.68548 | 0.000454 | 0.001176 |
| PITX1    | 2.616034 | 3.307195 | 0.691161 | 3.73E-09 | 4.96E-08 |
| PON1     | 8.27438  | 7.479634 | -0.79475 | 4.64E-07 | 2.96E-06 |
| DBN1     | 4.447031 | 5.162071 | 0.715039 | 1.73E-07 | 1.25E-06 |
| C6       | 7.32287  | 6.518602 | -0.80427 | 1.36E-06 | 7.46E-06 |
| S100A11  | 7.777318 | 8.506732 | 0.729414 | 3.40E-05 | 0.00012  |
| PRAME    | 2.809918 | 3.411408 | 0.601491 | 0.000208 | 0.000591 |
| IGFBP2   | 7.884542 | 7.224417 | -0.66012 | 0.000823 | 0.00197  |
| PKMYT1   | 3.136729 | 3.730989 | 0.59426  | 1.04E-13 | 9.44E-12 |
| FMO5     | 7.348523 | 6.719238 | -0.62929 | 7.17E-07 | 4.28E-06 |
| TROAP    | 3.82138  | 4.523848 | 0.702469 | 1.81E-12 | 8.71E-11 |
| CLGN     | 3.680996 | 4.581656 | 0.90066  | 5.52E-11 | 1.30E-09 |
| MBL2     | 6.479818 | 5.744268 | -0.73555 | 1.64E-05 | 6.42E-05 |
| PCK1     | 7.88365  | 6.754452 | -1.1292  | 6.32E-07 | 3.85E-06 |
| MELK     | 3.500431 | 4.253866 | 0.753434 | 4.32E-14 | 4.65E-12 |
| SLC1A2   | 4.569845 | 3.881984 | -0.68786 | 2.18E-06 | 1.11E-05 |
| DNASE1L3 | 4.24669  | 3.393467 | -0.85322 | 3.73E-13 | 2.61E-11 |
| APOC1    | 12.50797 | 11.89464 | -0.61333 | 6.32E-06 | 2.82E-05 |
| CENPA    | 3.083986 | 3.775238 | 0.691253 | 3.33E-16 | 1.39E-13 |
| SLC17A2  | 5.983151 | 5.378896 | -0.60426 | 4.78E-05 | 0.000162 |
| VEGFB    | 5.959443 | 6.757713 | 0.79827  | 6.34E-09 | 7.70E-08 |
| OTC      | 7.02573  | 6.201534 | -0.8242  | 7.92E-07 | 4.62E-06 |
| ABCC4    | 3.351745 | 4.000505 | 0.64876  | 1.24E-13 | 1.02E-11 |

|          |          |          |          |          |          |
|----------|----------|----------|----------|----------|----------|
| ITIH3    | 8.957706 | 8.219234 | -0.73847 | 9.25E-08 | 7.35E-07 |
| BACE2    | 3.676718 | 4.268065 | 0.591348 | 0.000866 | 0.002068 |
| RAP1GAP  | 4.289462 | 4.944433 | 0.654971 | 5.36E-07 | 3.34E-06 |
| IGFBP1   | 9.511334 | 8.803218 | -0.70812 | 6.34E-05 | 0.000207 |
| ITIH1    | 9.774077 | 9.172227 | -0.60185 | 1.15E-07 | 8.73E-07 |
| MCM2     | 4.427816 | 5.40533  | 0.977514 | 7.08E-15 | 1.15E-12 |
| SEC14L2  | 6.352431 | 5.753588 | -0.59884 | 7.18E-05 | 0.000231 |
| SERPINC1 | 11.56543 | 10.46856 | -1.09687 | 3.13E-08 | 2.95E-07 |
| LGALS4   | 7.06131  | 7.923185 | 0.861875 | 9.55E-05 | 0.000297 |
| C8A      | 7.075733 | 6.28775  | -0.78798 | 1.26E-07 | 9.46E-07 |
| SHBG     | 5.690763 | 5.098362 | -0.5924  | 0.000736 | 0.001788 |
| RRM2     | 4.552833 | 5.387349 | 0.834516 | 8.50E-13 | 4.80E-11 |
| CPS1     | 8.477988 | 7.508966 | -0.96902 | 0.000192 | 0.000554 |
| CA9      | 3.007897 | 4.026652 | 1.018756 | 2.62E-09 | 3.74E-08 |
| TMEM106  | 5.687408 | 6.387956 | 0.700548 | 1.26E-13 | 1.02E-11 |
